# Supplementary material for: Novel EBV LMP-2-affibody and affitoxin in molecular imaging and targeted therapy of nasopharyngeal carcinoma
Source: PLoS Pathog. 2020 Jan 6;16(1):e1008223. doi: 10.1371/journal.ppat.1008223 (PMC6964910; doi:10.1371/journal.ppat.1008223)
Supplement: S1 Table — (DOCX) [file ppat.1008223.s008.docx]

**S1Table.** Kinetic data from the SPR Biosensor Analysis of the Affibody molecules in

interaction with LMP-2 B-epitope fusion protein

| LMP-2 affibody | Ka(M-1 s-1) | kd (s-1) | KD (M) |
| --- | --- | --- | --- |
| ZEBV LMP-212 | 2.64×102 | 3.83×10-4 | 1.45×10-6 |
| ZEBV LMP-2132 | 3.35×102 | 1.25×10-3 | 3.74×10-6 |
| ZEBV LMP-2137 | 1.23×102 | 4.78×10-4 | 3.90×10-6 |
| ZEBV LMP-2142 | 6.45×102 | 7.37×10-4 | 1.14×10-6 |
